# Supplementary material
Source: ML conference proceedings conference paper supplement (https://openreview.net/forum?id=4hqe5fgmfj)
Supplement: supplementary_material [file attachment]

---

# Supplementary material: Regret Rates for Randomized Allocation Strategies for Nonparametric Bandits with Delayed Rewards

---

Anonymous Author(s)

Affiliation

Address

email

## 1 S1 Results with sub-exponential errors

2 In this section, we extend the finite-time regret rates for the two proposed strategies in Section 3 to  
3 the case with sub-exponential errors.

4 **Assumption S1.** We assume that  $\epsilon_j \sim \text{Sub-Exponential}(\nu^2, \alpha)$ , i.e.,

$$E(\exp(\lambda\epsilon_j)) \leq \exp\left\{\frac{\lambda^2\nu^2}{2}\right\}, \forall \lambda: |\lambda| < \frac{1}{\alpha}.$$

5 **Theorem S1.** Suppose assumption S1 and assumptions 2-6 in the paper are satisfied and  $\{\pi_n\}$   
6 is a decreasing sequence. Assume that  $N > n_\delta^{(3)}$  and the kernel estimator as defined in (2) and  
7 kernel chosen as described in (3). Then with probability larger than  $1 - 2\delta$ , the cumulative regret for  
8 strategy  $\eta_2$  satisfies,

$$R_N(\eta_2) < \begin{cases} An'_\delta + \sum_{n=n'_\delta+1}^N 2 \left( \max_{1 \leq i \leq \ell} w(Lh_{q(n)}; f_i) + \frac{C'_{N,\delta}}{\sqrt{h_{q(n)}^d \pi_{q(n)} q(n)}} \right) \\ \quad + A \sum_{t=1}^{N^*(\delta)} M_\delta(\ell-1)\pi_t + \max \left\{ A\sqrt{M_\delta \frac{E(\tau_N)}{2} \log\left(\frac{2}{\delta}\right)}, A\sqrt{\left(\frac{N}{2}\right) \log\left(\frac{2}{\delta}\right)} \right\}, \\ \quad \text{if } h_{q(n)}^d q(n) \pi_{q(n)} > \frac{8 \log(16\ell N^2/\delta)\alpha^2}{\nu^2 c_5 \underline{c} \tilde{a}_1 (2L)^d}, \\ An'_\delta + \sum_{n=n'_\delta+1}^N 2 \left( \max_{1 \leq i \leq \ell} w(Lh_{q(n)}; f_i) + \frac{C'_{N,\delta}}{h_{q(n)}^d \pi_{q(n)} q(n)} \right) \\ \quad + A \sum_{t=1}^{N^*(\delta)} M_\delta(\ell-1)\pi_t + \max \left\{ A\sqrt{M_\delta \frac{E(\tau_N)}{2} \log\left(\frac{2}{\delta}\right)}, A\sqrt{\left(\frac{N}{2}\right) \log\left(\frac{2}{\delta}\right)} \right\}, \\ \quad \text{if } h_{q(n)}^d q(n) \pi_{q(n)} < \frac{8 \log(16\ell N^2/\delta)\alpha^2}{\nu^2 c_5 \underline{c} \tilde{a}_1 (2L)^d}, \end{cases} \quad (\text{S1.1})$$

9 where,  $C'_{N,\delta} = \sqrt{8C^2\nu^2 \log(16\ell N^2/\delta)/c_5 \underline{c} \tilde{a}_1 (2L)^d}$  and  $C''_{N,\delta} =$   
10  $8\alpha C \log(16\ell N^2/\delta)/(c_5 \underline{c} \tilde{a}_1 (2L)^d)$ .

11 Note that the modification of sub-exponential errors does not effect the randomization error, however  
12 the estimation error changes depending upon the amount of delay and choice of the hyperparameters  
13  $\{h_n\}$  and  $\{\pi_n\}$ . Note that, we will get a similar result for strategy  $\eta_1$ . The proof can be found in  
14 section S3.

15 **S2 Proof of Lemmas**

16 *Proof of Lemma 1.* Recall,  $\tau_n = \sum_{j=1}^n I\{t_j \leq n\}$ . Then,  $E(\tau_n) = E(\sum_{j=1}^n I\{t_j \leq n\}) =$   
 17  $\sum_{j=1}^n P(t_j \leq n) = \sum_{j=1}^n G_j(n - s_j)$ . Now, by Assumption 7 we have, for large enough  $n$ , there  
 18 exists a positive integer  $a_1$ , such that,  $\sum_{j=1}^n G_j(n - s_j) \geq a_1 q(n)$ . Then using the inequality in  
 19 Corollary S2, we get,

$$\begin{aligned} P\left(\tau_n \leq \frac{a_1 q(n)}{2}\right) &\leq P\left(\tau_n \leq \frac{\sum_{j=1}^n G_j(n - s_j)}{2}\right) \\ &\leq \exp\left(-\frac{3 \sum_{j=1}^n G_j(n - s_j)}{28}\right) \\ &\leq \exp\left(\frac{-3a_1 q(n)}{28}\right). \end{aligned}$$

20 It is easy to see that the upper bound is summable in  $n$  under the condition (10) and (8). By the  
 21 Borel-Cantelli lemma, the event  $\{\tau_n > a_1 q(n)/2\}$  happens infinitely often, therefore  $\tau_n \xrightarrow{\text{a.s.}} \infty$ .  
 22 Note that, by construction this implies that  $h_{\tau_n} \xrightarrow{\text{a.s.}} 0$ , and  $\pi_{\tau_n} \xrightarrow{\text{a.s.}} 0$  as  $n \rightarrow \infty$ . As an immediate  
 23 consequence of this along with continuity of  $f$ , we get that  $w(h_{\tau_n}; f) \xrightarrow{\text{a.s.}} 0$ , as  $n \rightarrow \infty$ .  $\square$

24 **S2.1 Proof of Lemma 2**

25 *Proof of Lemma 2.* Recall that  $Q_{n+1}(x) = \{1 \leq j \leq n : 1 \leq t_j \leq n, \|x - X_j\| \leq Lh_{\tau_n}\}$   
 26 and  $Q_{i,n+1}(x) = \{1 \leq j \leq n : j \in Q_{n+1}(x), I_j = i\}$ . Let  $M_{n+1}(x)$  and  $M_{i,n+1}(x)$  be the  
 27 size of  $Q_{n+1}(x)$  and  $Q_{i,n+1}(x)$ , respectively. It can be seen that if  $M_{n+1}(x) = 0$ , (5) trivially  
 28 holds. Therefore, without loss of generality we can assume  $M_{n+1}(x) > 0$ . For the event  $B_{i,n} =$   
 29  $\left\{\frac{1}{M_{i,n+1}(x)} \sum_{j \in J_{i,n+1}} K\left(\frac{x - X_j}{h_{\tau_n}}\right) \geq c_5\right\}$ . Note that,

$$\begin{aligned} &P_{X^n, \mathcal{A}_N}\left(|\hat{f}_{i,n+1}(x) - f_i(x)| \geq \epsilon\right) \\ &= P_{X^n, \mathcal{A}_N}\left(|\hat{f}_{i,n+1}(x) - f_i(x)| \geq \epsilon, \frac{M_{i,n+1}(x)}{M_{n+1}(x)} \leq \frac{\pi_{\tau_n}}{2}\right) \\ &\quad + P_{X^n, \mathcal{A}_N}\left(|\hat{f}_{i,n+1}(x) - f_i(x)| \geq \epsilon, \frac{M_{i,n+1}(x)}{M_{n+1}(x)} > \frac{\pi_{\tau_n}}{2}\right) \\ &\leq P_{X^n, \mathcal{A}_N}\left(\frac{M_{i,n+1}(x)}{M_{n+1}(x)} \leq \frac{\pi_{\tau_n}}{2}\right) + P_{X^n, \mathcal{A}_N}\left(|\hat{f}_{i,n+1}(x) - f_i(x)| \geq \epsilon, \frac{M_{i,n+1}(x)}{M_{n+1}(x)} > \frac{\pi_{\tau_n}}{2}\right) \\ &\stackrel{a}{\leq} \exp\left(-\frac{3M_{n+1}(x)\pi_{\tau_n}}{28}\right) + P_{X^n, \mathcal{A}_N}\left(|\hat{f}_{i,n+1}(x) - f_i(x)| \geq \epsilon, \frac{M_{i,n+1}(x)}{M_{n+1}(x)} > \frac{\pi_{\tau_n}}{2}, B_{i,n}\right) \\ &\quad + P_{X^n, \mathcal{A}_N}\left(|\hat{f}_{i,n+1}(x) - f_i(x)| \geq \epsilon, \frac{M_{i,n+1}(x)}{M_{n+1}(x)} > \frac{\pi_{\tau_n}}{2}, B_{i,n}^c\right) \\ &=: \exp\left(-\frac{3M_{n+1}(x)\pi_{\tau_n}}{28}\right) + A_1 + A_2, \end{aligned} \tag{S2.1}$$

30 where the first term in the inequality in step  $a$  comes from the extended Bernstein inequality (S6.2).  
 31 By Assumption 5 and the definition 1 of the modulus of continuity, we have,

$$\begin{aligned}
& |\hat{f}_{i,n+1}(x) - f_i(x)| \\
&= \left| \frac{\sum_{j \in J_{i,n+1}} Y_{i,j} K\left(\frac{x-X_j}{h_{\tau_n}}\right)}{\sum_{j \in J_{i,n+1}} K\left(\frac{x-X_j}{h_{\tau_n}}\right)} - f_i(x) \right| \\
&= \left| \frac{\sum_{j \in J_{i,n+1}} (f_i(X_j) + \epsilon_j) K\left(\frac{x-X_j}{h_{\tau_n}}\right)}{\sum_{j \in J_{i,n+1}} K\left(\frac{x-X_j}{h_{\tau_n}}\right)} - f_i(x) \right| \\
&= \left| \frac{\sum_{j \in J_{i,n+1}} (f_i(X_j) - f_i(x)) K\left(\frac{x-X_j}{h_{\tau_n}}\right)}{\sum_{j \in J_{i,n+1}} K\left(\frac{x-X_j}{h_{\tau_n}}\right)} + \frac{\sum_{j \in J_{i,n+1}} \epsilon_j K\left(\frac{x-X_j}{h_{\tau_n}}\right)}{\sum_{j \in J_{i,n+1}} K\left(\frac{x-X_j}{h_{\tau_n}}\right)} \right| \\
&\leq \sup_{x,y: \|x-y\|_\infty \leq Lh_{\tau_n}} |f_i(x) - f_i(y)| + \left| \frac{\sum_{j \in J_{i,n+1}} \epsilon_j K\left(\frac{x-X_j}{h_{\tau_n}}\right)}{\sum_{j \in J_{i,n+1}} K\left(\frac{x-X_j}{h_{\tau_n}}\right)} \right| \\
&= w(Lh_{\tau_n}; f_i) + \left| \frac{\sum_{j \in J_{i,n+1}} \epsilon_j K\left(\frac{x-X_j}{h_{\tau_n}}\right)}{\sum_{j \in J_{i,n+1}} K\left(\frac{x-X_j}{h_{\tau_n}}\right)} \right|. \tag{S2.2}
\end{aligned}$$

32 Under  $B_{i,n}$ ,

$$|\hat{f}_{i,n+1}(x) - f_i(x)| \leq w(Lh_{\tau_n}; f_i) + \frac{1}{c_5 M_{i,n+1}(x)} \left| \sum_{j \in Q_{i,n+1}(x)} \epsilon_j K\left(\frac{x-X_j}{h_{\tau_n}}\right) \right|.$$

33 Using this, we will construct an upper bound for  $A_1$ . Define  $\sigma_t = \inf\{\tilde{n} : \sum_{j=1}^{\tilde{n}} I\{I_j = i, t_j \leq$   
 34  $n, \|x - X_j\| \leq Lh_{\tau_n}\} \geq t\}$ ,  $t \geq 1$ . Then, for large enough  $n$ , by Lemma 1,  $\epsilon > w(Lh_{\tau_n}, f_i)$  a.s.  
 35 and we have,

$$\begin{aligned}
A_1 &\leq P_{X^n, \mathcal{A}_N} \left( \left| \sum_{j \in Q_{i,n+1}(x)} \epsilon_j K\left(\frac{x-X_j}{h_{\tau_n}}\right) \right| \geq c_5 M_{i,n+1}(x) (\epsilon - w(Lh_{\tau_n}; f_i)), \right. \\
&\quad \left. \frac{M_{i,n+1}(x)}{M_{n+1}(x)} > \frac{\pi_{\tau_n}}{2} \right) \\
&\leq \sum_{\bar{n}=0}^n P_{X^n, \mathcal{A}_N} \left( \left| \sum_{t=1}^{\bar{n}} \epsilon_{\sigma_t} K\left(\frac{x-X_{\sigma_t}}{h_{\tau_n}}\right) \right| \geq c_5 \bar{n} (\epsilon - w(Lh_{\tau_n}, f_i)), \right. \\
&\quad \left. \frac{M_{i,n+1}(x)}{M_{n+1}(x)} > \frac{\pi_{\tau_n}}{2}, M_{i,n+1}(x) = \bar{n} \right) \\
&\leq \sum_{\lceil M_{n+1}(x) \pi_{\tau_n} / 2 \rceil}^n P_{X^n, \mathcal{A}_N} \left( \left| \sum_{t=1}^{\bar{n}} \epsilon_{\sigma_t} K\left(\frac{x-X_{\sigma_t}}{h_{\tau_n}}\right) \right| \geq c_5 \bar{n} (\epsilon - w(Lh_{\tau_n}; f_i)) \right) \\
&\leq \sum_{\lceil M_{n+1}(x) \pi_{\tau_n} / 2 \rceil}^n 2 \exp \left( - \frac{\bar{n} c_5^2 (\epsilon - w(Lh_{\tau_n}; f_i))^2}{2c_4^2 v^2 + 2c_4 c (\epsilon - w(Lh_{\tau_n}; f_i))} \right) \\
&\leq 2N \exp \left( - \frac{c_5^2 M_{n+1}(x) \pi_{\tau_n} (\epsilon - w(Lh_{\tau_n}; f_i))^2}{4c_4^2 v^2 + 4c_4 c (\epsilon - w(Lh_{\tau_n}; f_i))} \right), \tag{S2.3}
\end{aligned}$$

36 where the last inequality follows from Lemma S8 and the upper boundedness of the kernel function  
 37 (assumption 5). Now, to find the bound for  $A_2$ , under  $B_{i,n}^c$  we run into technical problems since the  
 38 denominator of the Nadaraya-Watson estimator can be extremely small, hence we will replace the

39 kernel  $K(\cdot)$  in (2) with a uniform kernel  $I(\|u\|_\infty \leq L)$ . That is for the case when,

$$B_{i,n}^c := \left\{ \sum_{j \in J_{i,n+1}} K\left(\frac{x - X_j}{h_{\tau_n}}\right) < c_5 \sum_{j \in J_{i,n+1}} I(\|x - X_j\|_\infty \leq Lh_{\tau_n}) \right\}, \quad (\text{S2.4})$$

40 for some small positive constant  $0 < c_5 < 1$ , we will use the uniform kernel. Therefore, using (S2.2),  
41 (S2.4) and (S6.5) (Lemma S8), we get that,

$$\begin{aligned} A_2 &\leq P_{X^n, \mathcal{A}_N} \left( \left| \sum_{j \in J_{i,n+1}} \epsilon_j I(\|x - X_j\| \leq Lh_{\tau_n}) \right| \geq M_{i,n+1}(x)(\epsilon - w(Lh_{\tau_n}; f_i)), \right. \\ &\quad \left. \frac{M_{i,n+1}(x)}{M_{n+1}(x)} > \frac{\pi_{\tau_n}}{2} \right) \\ &\leq \sum_{\bar{n}=0}^n P_{X^n, \mathcal{A}_N} \left( \left| \sum_{t=1}^{\bar{n}} \epsilon_{\sigma_t} I(\|x - X_{\sigma_t}\| \leq Lh_{\tau_n}) \right| \geq \bar{n}(\epsilon - w(Lh_{\tau_n}; f_i)), \right. \\ &\quad \left. \frac{M_{i,n+1}(x)}{M_{n+1}(x)} > \frac{\pi_{\tau_n}}{2}, M_{i,n+1}(x) = \bar{n} \right) \\ &\leq \sum_{[M_{n+1}(x)\pi_{\tau_n}/2]}^n P_{X^n, \mathcal{A}_N} \left( \left| \sum_{t=1}^{\bar{n}} \epsilon_{\sigma_t} I(\|x - X_{\sigma_t}\| \leq Lh_{\tau_n}) \right| \geq \bar{n}(\epsilon - w(Lh_{\tau_n}; f_i)) \right) \\ &\leq \sum_{[M_{n+1}(x)\pi_{\tau_n}/2]}^n 2 \exp\left(-\frac{\bar{n}(\epsilon - w(Lh_{\tau_n}; f_i))^2}{2v^2 + 2c(\epsilon - w(Lh_{\tau_n}; f_i))}\right) \\ &\leq 2N \exp\left(-\frac{M_{n+1}(x)\pi_{\tau_n}(\epsilon - w(Lh_{\tau_n}; f_i))^2}{4v^2 + 4c(\epsilon - w(Lh_{\tau_n}; f_i))}\right). \end{aligned} \quad (\text{S2.5})$$

42 Therefore, using the fact that  $0 < c_5 \leq 1 \leq c_4$ , (S2.3) and (S2.5) in (S2.1), we get,

$$\begin{aligned} &P_{X^n, \mathcal{A}_N} \left( |\hat{f}_{i,n+1}(x) - f_i(x)| \geq \epsilon \right) \\ &\leq \exp\left(-\frac{3M_{n+1}(x)\pi_{\tau_n}}{28}\right) + 4N \exp\left(-\frac{c_5^2 M_{n+1}(x)\pi_{\tau_n}(\epsilon - w(Lh_{\tau_n}; f_i))^2}{4c_4^2 v^2 + 4c_4 c(\epsilon - w(Lh_{\tau_n}; f_i))}\right). \end{aligned} \quad (\text{S2.6})$$

43 □

44 The proof for Lemma 3 will follow the same steps with  $\pi_{\tau_n}$  replaced by  $\pi_n$ . Next, we prove a lemma  
45 that would be used to prove Theorem 1.

46

47 **Lemma S1.** *4 An  $\epsilon$  that satisfies,*

$$4N \exp\left(-\frac{c_5^2 \tilde{a}_1 (2Lh_{q(n)})^d \pi_{q(n)} q(n) (\epsilon - w(Lh_{q(n)}; f_i))^2}{16c_4^2 v^2 + 16c_4 c(\epsilon - w(Lh_{q(n)}; f_i))}\right) \leq \frac{\delta}{4\ell N}, \quad (\text{S2.7})$$

48 *is given by,*

$$\tilde{\epsilon}_{i,n} = w(Lh_{q(n)}; f_i) + \sqrt{\frac{64c_4^2 v^2 \log(16\ell N^2/\delta)}{c_5^2 \tilde{a}_1 (2L)^d h_{q(n)}^d \pi_{q(n)} q(n)}}.$$

49 *Proof for Lemma S1.* Let  $Z := \epsilon - w(Lh_{q(n)}; f_i)$ , then (S2.7) becomes,

$$\frac{c_5^2 \tilde{a}_1 (2Lh_{q(n)})^d \pi_{q(n)} q(n) Z^2}{16c_4^2 v^2 + 16c_4 cZ} \geq \log\left(\frac{16\ell N^2}{\delta}\right).$$

50 Let  $A_1 = c_5^2 \tilde{a}_1 (2L)^d$ ,  $A_2 = 16c_4^2 v^2$ ,  $A_3 = 16c_4 c$ .

$$A_1 q(n) h_{q(n)}^d \pi_{q(n)} Z^2 - A_3 \log\left(\frac{16\ell N^2}{\delta}\right) Z - A_2 \log\left(\frac{16\ell N^2}{\delta}\right) \geq 0. \quad (\text{S2.8})$$

51 Left hand side is a quadratic polynomial in  $Z$ . Solving for  $Z$ ,

$$\begin{aligned} & A_1 q(n) h_{q(n)}^d \pi_{q(n)} Z^2 - A_3 \log\left(\frac{16\ell N^2}{\delta}\right) Z - A_2 \log\left(\frac{16\ell N^2}{\delta}\right) = 0 \\ \Rightarrow Z &= \frac{1}{2} \left( \frac{A_3 \log(16\ell N^2/\delta)}{A_1 q(n) h_{q(n)}^d \pi_{q(n)}} \pm \sqrt{\frac{A_3^2 \log^2(16\ell N^2/\delta)}{(A_1 q(n) h_{q(n)}^d \pi_{q(n)})^2} + \frac{4A_2 \log(16\ell N^2/\delta)}{A_1 q(n) h_{q(n)}^d \pi_{q(n)}}} \right). \end{aligned}$$

52 This will give two real roots for the quadratic equation. Therefore if we want some value of  $Z$  such  
53 that (S2.8) holds, we can use a point that is larger than the roots  $-b \pm \sqrt{b^2 + d^2}$  and we know that  
54  $d \geq -b \pm \sqrt{b^2 + d^2}$ . Therefore, a potential candidate could be,

$$\begin{aligned} Z &= \sqrt{\frac{4A_2 \log(16\ell N^2/\delta)}{A_1 q(n) h_{q(n)}^d \pi_{q(n)}}} \\ &= \sqrt{\frac{64c_4^2 v^2 \log(16\ell N^2/\delta)}{c_5^2 \underline{c} \tilde{a}_1 (2L)^d h_{q(n)}^d \pi_{q(n)} q(n)}}, \end{aligned}$$

56 which means that we want

$$\tilde{\epsilon}_{i,n} = w(Lh_{q(n)}; f_i) + \sqrt{\frac{64c_4^2 v^2 \log(16\ell N^2/\delta)}{c_5^2 \underline{c} \tilde{a}_1 (2L)^d h_{q(n)}^d \pi_{q(n)} q(n)}}.$$

57 □

58 A similar lemma with  $\pi_{q(n)}$  replaced by  $\pi_n$  could be derived that will be used in the proof of Theorem  
59 2.

60 **Lemma S2.** 5 An  $\epsilon$  that satisfies,

$$4N \exp\left(-\frac{c_5^2 \underline{c} \tilde{a}_1 (2Lh_{q(n)})^d \pi_n q(n) (\epsilon - w(Lh_{q(n)}; f_i))^2}{16c_4^2 v^2 + 16c_4 c (\epsilon - w(Lh_{q(n)}; f_i))}\right) \leq \frac{\delta}{4\ell N}, \quad (\text{S2.9})$$

61 is given by,

$$\tilde{\epsilon}'_{i,n} = w(Lh_{q(n)}; f_i) + \sqrt{\frac{64c_4^2 v^2 \log(16\ell N^2/\delta)}{c_5^2 \underline{c} \tilde{a}_1 (2L)^d h_{q(n)}^d \pi_n q(n)}}.$$

### 62 S3 Proof of Theorems

63 *Proof of Theorem 1.* By definition of  $\hat{i}_j$ ,  $\hat{f}_{i^*(X_j),j} \leq \hat{f}_{\hat{i}_j,j}(X_j)$ , then the regret accumulated after the  
64 initial forced sampling period is,

$$\begin{aligned} & \sum_{j=m_0+1}^N (f^*(X_j) - f_{I_j}(X_j)) \\ &= \sum_{j=m_0+1}^N (f_{i^*(X_j)}(X_j) - \hat{f}_{i^*(X_j),j}(X_j) + \hat{f}_{i^*(X_j),j}(X_j) - f_{\hat{i}_j}(X_j)) \\ & \quad + f_{\hat{i}_j}(X_j) - f_{I_j}(X_j) \\ &\leq \sum_{j=m_0+1}^N (f_{i^*(X_j)}(X_j) - \hat{f}_{i^*(X_j),j}(X_j) + \hat{f}_{\hat{i}_j,j}(X_j) - f_{\hat{i}_j}(X_j)) \\ & \quad + f_{\hat{i}_j}(X_j) - f_{I_j}(X_j) \\ &\leq \sum_{j=m_0+1}^N (2 \sup_{1 \leq i \leq l} |\hat{f}_{i,j}(X_j) - f_i(X_j)| + AI\{I_j \neq \hat{i}_j\}) \end{aligned} \quad (\text{S3.1})$$

65 Here the first term corresponds to the regret incurred due to estimation error and the second term  
66 corresponds to the randomization error.

67 We will first find an upper bound for the estimation error. Note that Lemma 2 gives a probability  
68 inequality for the estimation error conditional on  $\mathcal{A}_N$  and  $X^n$ . Therefore, in order to get a probability  
69 (not conditional) bound on the estimation error, we first remove this condition on  $X^n$  and then  
70 remove the condition on  $\mathcal{A}_N$  in (5). Given arm  $i$ , for a large enough  $n$  satisfying  $n \geq m_0 + 1$  and  
71  $\epsilon > w(Lh_{\tau_n}; f_i)$  a.s., consider,

$$\begin{aligned}
& P_{\mathcal{A}_N}(|\hat{f}_{i,n+1}(X_{n+1}) - f_i(X_{n+1})| \geq \epsilon) \\
&= P_{\mathcal{A}_N} \left( |\hat{f}_{i,n+1}(X_{n+1}) - f_i(X_{n+1})| \geq \epsilon, M_{n+1}(X_{n+1}) \leq \frac{\underline{c}(2Lh_{\tau_n})^d \tau_n}{2} \right) \\
&\quad + P_{\mathcal{A}_N} \left( |\hat{f}_{i,n+1}(X_{n+1}) - f_i(X_{n+1})| \geq \epsilon, M_{n+1}(X_{n+1}) > \frac{\underline{c}(2Lh_{\tau_n})^d \tau_n}{2} \right) \quad (\text{S3.2}) \\
&\leq P_{\mathcal{A}_N} \left( M_{n+1}(X_{n+1}) \leq \frac{\underline{c}(2Lh_{\tau_n})^d \tau_n}{2} \right) \\
&\quad + P_{\mathcal{A}_N} \left( |\hat{f}_{i,n+1}(X_{n+1}) - f_i(X_{n+1})| \geq \epsilon, M_{n+1}(X_{n+1}) > \frac{\underline{c}(2Lh_{\tau_n})^d \tau_n}{2} \right) \\
&\leq \exp \left( -\frac{3\underline{c}(2Lh_{\tau_n})^d \tau_n}{28} \right) + \exp \left( -\frac{3\underline{c}(2Lh_{\tau_n})^d \tau_n \pi_{\tau_n}}{56} \right) \\
&\quad + 4N \exp \left( -\frac{c_5^2 \underline{c}(2Lh_{\tau_n})^d \tau_n \pi_{\tau_n} (\epsilon - w(Lh_{\tau_n}; f_i))^2}{8c_4^2 v^2 + 8c_4 c (\epsilon - w(Lh_{\tau_n}; f_i))} \right) \quad (\text{S3.3})
\end{aligned}$$

72 where, the above inequality follows from Lemma 2 and (S6.2), and the fact that  
73  $E(M_{n+1}(X_{n+1}) | \mathcal{A}_N) \geq \underline{c}(2Lh_{\tau_n})^d \tau_n$ .

74

75 Now, we want to remove the condition on  $\mathcal{A}_N$  from the conditional probability above. Recall that  
76  $d_j \stackrel{\text{ind}}{\sim} G_j$ , for  $j \geq 1$ . Therefore, for the known visiting times  $\{s_j, j \geq 1\}$ ,  $P(t_j \leq n) = P(d_j + s_j \leq$   
77  $n) = P(d_j \leq n - s_j) = G_j(n - s_j)$ , hence,

$$\begin{aligned}
& P(|\hat{f}_{i,n+1}(X_{n+1}) - f_i(X_{n+1})| \geq \epsilon) \\
&= P \left( |\hat{f}_{i,n+1}(X_{n+1}) - f_i(X_{n+1})| \geq \epsilon, \tau_n \leq \frac{\sum_{j=1}^n G_j(n - s_j)}{2} \right) \\
&\quad + P \left( |\hat{f}_{i,n+1}(X_{n+1}) - f_i(X_{n+1})| \geq \epsilon, \tau_n > \frac{\sum_{j=1}^n G_j(n - s_j)}{2} \right) \\
&\leq P \left( \tau_n \leq \frac{\sum_{j=1}^n G_j(n - s_j)}{2} \right) \\
&\quad + P \left( |\hat{f}_{i,n+1}(X_{n+1}) - f_i(X_{n+1})| \geq \epsilon, \tau_n > \frac{\sum_{j=1}^n G_j(n - s_j)}{2} \right) \\
&\leq P \left( \tau_n \leq \frac{\sum_{j=1}^n G_j(n - s_j)}{2} \right) \\
&\quad + P \left( |\hat{f}_{i,n+1}(X_{n+1}) - f_i(X_{n+1})| \geq \epsilon, \tau_n > \frac{a_1 q(n)}{2} \right) \\
&= P \left( \tau_n \leq \frac{\sum_{j=1}^n G_j(n - s_j)}{2} \right) \\
&\quad + E \left[ P_{\mathcal{A}_N} \left( |\hat{f}_{i,n+1}(X_{n+1}) - f_i(X_{n+1})| \geq \epsilon, \tau_n > \frac{a_1 q(n)}{2} \right) \right], \quad (\text{S3.4})
\end{aligned}$$

78 for large enough  $n$ , where  $a_1$  is a positive constant arising from Assumption 7. Also, note that the  
79 second term in the last equality (S3.4) is due to the law of iterated expectation. Let  $q_1(n) = q(n)/2$ .

80 For  $\tau_n > a_1 q_1(n)$ , since we have the condition that  $h_{q(n)}^d \pi_{q(n)} q(n) / \log n \rightarrow \infty$ , for large enough  
81  $n$ , we can assume that  $h_{\tau_n}^d \tau_n \geq \tilde{a}_1 h_{q_1(n)}^d q_1(n)$  and  $h_{\tau_n}^d \pi_{\tau_n} \tau_n \geq \tilde{a}_1 h_{q_1(n)}^d \pi_{q_1(n)} q_1(n)$ , where  $\tilde{a}_1$  is a  
82 constant that is function of constant  $a_1$ , which depends on the user determined choice of sequences  
83  $\{\pi_n\}$  and  $\{h_n\}$ . For large enough  $n$ ,  $\epsilon - w(Lh_{q(n)}; f_i) > 0$ , and we have using (S3.3) and (S6.2) in  
84 (S3.4),

$$\begin{aligned}
&\leq \exp\left(-\frac{3a_1 q_1(n)}{14}\right) + \exp\left(-\frac{3\underline{c}\tilde{a}_1(2Lh_{q_1(n)})^d q_1(n)}{28}\right) \\
&\quad + \exp\left(-\frac{3\underline{c}\tilde{a}_1(2Lh_{q_1(n)})^d q_1(n)\pi_{q_1(n)}}{56}\right) \\
&\quad + 4N \exp\left(-\frac{c_5^2 \underline{c}\tilde{a}_1(2Lh_{q_1(n)})^d q_1(n)\pi_{q_1(n)}(\epsilon - w(Lh_{q_1(n)}; f_i))^2}{8c_4^2 v^2 + 8c_4 c(\epsilon - w(Lh_{q_1(n)}; f_i))}\right) \\
&\leq \exp\left(-\frac{3a_1 q(n)}{28}\right) + \exp\left(-\frac{3\underline{c}\tilde{a}_1(2Lh_{q(n)})^d q(n)}{56}\right) \\
&\quad + \exp\left(-\frac{3\underline{c}\tilde{a}_1(2Lh_{q(n)})^d q(n)\pi_{q(n)}}{112}\right) \\
&\quad + 4N \exp\left(-\frac{c_5^2 \underline{c}\tilde{a}_1(2Lh_{q(n)})^d q(n)\pi_{q(n)}(\epsilon - w(Lh_{q(n)}; f_i))^2}{16c_4^2 v^2 + 16c_4 c(\epsilon - w(Lh_{q(n)}; f_i))}\right). \tag{S3.5}
\end{aligned}$$

85 Given  $0 < \delta < 1$ , we want to bound the right hand side above by  $\delta$ . To do that for the first three  
86 terms, given total time horizon  $N$ , we define a special time point  $n'_\delta$  as in (7) by,

$$n'_\delta = \min \left\{ n > m_0 : \exp\left(-\frac{3\underline{c}\tilde{a}_1(2Lh_{q(n)})^d \pi_{q(n)} q(n)}{112}\right) \leq \frac{\delta}{4\ell N} \right\}. \tag{S3.6}$$

87 For the fourth term in the right hand side of (S3.5), we want to choose an  $\epsilon$  such that,

$$4N \exp\left(-\frac{c_5^2 \underline{c}\tilde{a}_1(2Lh_{q(n)})^d \pi_{q(n)} q(n)(\epsilon - w(Lh_{q(n)}; f_i))^2}{16c_4^2 v^2 + 16c_4 c(\epsilon - w(Lh_{q(n)}; f_i))}\right) \leq \frac{\delta}{4\ell N},$$

88 One such value for  $\epsilon$  as shown in Lemma S1 is given by,

$$\tilde{\epsilon}_{i,n} = w(Lh_{q(n)}; f_i) + \sqrt{\frac{64c_4^2 v^2 \log(16\ell N^2/\delta)}{c_5^2 \underline{c}\tilde{a}_1(2L)^d h_{q(n)}^d \pi_{q(n)} q(n)}}. \tag{S3.7}$$

89 By (S3.5), (S3.6) and (S3.7), for  $n \geq n'_\delta$ , we have that,

$$P\left(|\hat{f}_{i,n+1}(X_{n+1}) - f_i(X_{n+1})| \geq \tilde{\epsilon}_{i,n}\right) \leq \frac{\delta}{4\ell N} + \frac{\delta}{4\ell N} + \frac{\delta}{4\ell N} + \frac{\delta}{4\ell N} = \frac{\delta}{\ell N},$$

90 which implies that,

$$P\left(\sum_{n'_\delta+1}^N 2 \sup_{1 \leq i \leq \ell} |\hat{f}_{i,n}(X_n) - f_i(X_n)| \geq \sum_{n'_\delta+1}^N 2 \max_{1 \leq i \leq \ell} \tilde{\epsilon}_{i,n-1}\right) \leq \delta. \tag{S3.8}$$

91 Now we want to get a bound for the randomization error.

92 Let  $\sigma_t = \min\{\bar{n} : \sum_{j=n'_\delta+1}^{\bar{n}} I(t_j \leq N) \geq t\}$ , for  $t \in \mathbb{Z}$ . Recall that for strategy  $\eta_2$ , we update only  
93 when a new reward is observed that is at every  $\sigma_t, t \geq 1$ . In between the time points corresponding to  
94 two consecutive reward observations,  $\{\pi_t\}$  takes the same as the value for the previous observed case.  
95 In other words, we have  $\sigma_{t+1} - \sigma_t$  same values  $(\ell - 1)\pi_t$  for the exploration probability for each  $t$ ,  
96 hence  $\sum_{n=n'_\delta+1}^N P(I_n \neq \hat{i}_n) = \sum_{n=n'_\delta+1}^N (\ell - 1)\pi_{\tau_n} = \sum_{t=1}^{\tau_N} (\sigma_{t+1} - \sigma_t)(\ell - 1)\pi_t$ , and w.l.o.g.,  
97 assume that  $\sigma_{\tau_N+1} = N$ .

98 Given  $\epsilon > 0$  and the set of observed indices by time  $N$ ,  $\mathcal{A}_N$ , we have by the Bernstein's inequality  
 99 (S6.1) that,

$$\begin{aligned} P_{\mathcal{A}_N, X^N} \left( A \left( \sum_{n=n'_\delta+1}^N I(I_n \neq \hat{i}_n) - \sum_{t=1}^{\tau_N} (\sigma_{t+1} - \sigma_t)(\ell - 1)\pi_t \right) \geq \epsilon \right) \\ \leq \exp \left( - \frac{\epsilon^2}{2A^2(\sum_{t=1}^{\tau_N} (\sigma_{t+1} - \sigma_t)(\ell - 1)\pi_t[1 - (\ell - 1)\pi_t] + \epsilon/3)} \right). \end{aligned} \quad (\text{S3.9})$$

100 Next, for some positive constant  $M > 0$ , we study the event  $B_t := \{\sigma_{t+1} - \sigma_t > M\}$  for  $t \geq 1$ .  
 101 Note that, the event  $B_t$  is contained in the event that the first  $M/2$  cases in  $[\sigma_t, \sigma_{t+1}]$  are delayed by  
 102 more than  $M/2$ , that is,

$$\{\sigma_{t+1} - \sigma_t > M\} \subset \left\{ d_{\sigma_{t+1}} > \frac{M}{2}, \dots, d_{\sigma_{t+M/2}} > \frac{M}{2} \right\}.$$

103 Therefore, using this fact and by independence of delays, we have that,

$$\begin{aligned} P(\sigma_{t+1} - \sigma_t > M) &\leq P\left(d_{\sigma_{t+1}} > \frac{M}{2}, \dots, d_{\sigma_{t+M/2}} > \frac{M}{2}\right) \\ &\leq \prod_{s=1}^{M/2} P\left(d_{\sigma_t+s} > \frac{M}{2}\right) \\ &= \prod_{s=1}^{M/2} \left(1 - G_{d_{\sigma_t+s}}\left(\frac{M}{2}\right)\right) \end{aligned} \quad (\text{S3.10})$$

$$\begin{aligned} &\leq \left(\frac{M/2 - \sum_{s=1}^{M/2} G_{d_{\sigma_t+s}}(M/2)}{M/2}\right)^{M/2} \\ &\leq \left(1 - \frac{a_1 q(M/2)}{M/2}\right)^{M/2}, \text{ for all } t = 1, \dots, \tau_N, \end{aligned} \quad (\text{S3.11})$$

104 where the second to last inequality comes from AM-GM inequality and the last inequality follows  
 105 from Assumption 7 and  $q(M/2) \leq M/2$  for all  $M$ , by construction. We see that the above upper  
 106 bound decays at an exponential rate as  $M$  grows. As the above right hand side is free of  $t$  (by  
 107 independence of delays), we have that,

$$P\left(\max_t (\sigma_{t+1} - \sigma_t) \geq M\right) \leq \left(1 - \frac{a_1 q(M/2)}{M/2}\right)^{M/2}.$$

108 We can choose  $M$  such that, for a given  $\delta$ ,

$$\left(1 - \frac{a_1 q(M/2)}{M/2}\right)^{M/2} = \delta. \quad (\text{S3.12})$$

109 Given  $q$  and  $a_1$ , we can solve for  $M$  in the above equation. Consequently, since  $M$  will depend on  $\delta$ ,  
 110 we denote it as  $M_\delta$ . Depending on what  $q$  is for a given problem, we will always be able to find a  
 111 corresponding  $M_\delta$ .

112 Also, note that using Hoeffding's inequality (S4), we have that,

$$P\left(\tau_N \geq E(\tau_N) + \frac{\epsilon}{A}\right) \leq \exp\left(-\frac{2\epsilon^2}{A^2 N}\right). \quad (\text{S3.13})$$

113 We can choose  $\epsilon_1(N, \delta) = \sqrt{(N/2) \log(1/\delta)}$  such that this probability is less than  $\delta$ , that is,

$$P(\tau_N \geq E(\tau_N) + \epsilon_1(N, \delta)) \leq \delta. \quad (\text{S3.14})$$



114 Now consider,

$$\begin{aligned}
& P\left(A\left(\sum_{n=n'_\delta+1}^N I(I_n \neq \hat{i}_n) - \sum_{t=1}^{\tau_N} (\sigma_{t+1} - \sigma_t)(\ell - 1)\pi_t\right) \geq \epsilon\right) \\
&= P\left(\left(\sum_{n=n'_\delta+1}^N I(I_n \neq \hat{i}_n) - \sum_{t=1}^{\tau_N} (\sigma_{t+1} - \sigma_t)(\ell - 1)\pi_t\right) \geq \frac{\epsilon}{A}, \max_t(\sigma_{t+1} - \sigma_t) \geq M_\delta\right) \\
&\quad + P\left(\left(\sum_{n=n'_\delta+1}^N I(I_n \neq \hat{i}_n) - \sum_{t=1}^{\tau_N} (\sigma_{t+1} - \sigma_t)(\ell - 1)\pi_t\right) \geq \frac{\epsilon}{A}, \max_t(\sigma_{t+1} - \sigma_t) < M_\delta\right) \\
&\leq P\left(\max_t(\sigma_{t+1} - \sigma_t) \geq M_\delta\right) \\
&\quad + P\left(\left(\sum_{n=n'_\delta+1}^N I(I_n \neq \hat{i}_n) - \sum_{t=1}^{\tau_N} (\sigma_{t+1} - \sigma_t)(\ell - 1)\pi_t\right) \geq \frac{\epsilon}{A}, \max_t(\sigma_{t+1} - \sigma_t) < M_\delta, \right. \\
&\quad \quad \left. \tau_N \geq E(\tau_N) + \frac{\epsilon}{A}\right) \\
&\quad + P\left(\left(\sum_{n=n'_\delta+1}^N I(I_n \neq \hat{i}_n) - \sum_{t=1}^{\tau_N} (\sigma_{t+1} - \sigma_t)(\ell - 1)\pi_t\right) \geq \frac{\epsilon}{A}, \right. \\
&\quad \quad \left. \max_t(\sigma_{t+1} - \sigma_t) < M_\delta, \tau_N < E(\tau_N) + \frac{\epsilon}{A}\right) \\
&\leq P\left(\max_t(\sigma_{t+1} - \sigma_t) \geq M_\delta\right) + P\left(\tau_N \geq E(\tau_N) + \frac{\epsilon}{A}\right) \\
&\quad + P\left(\left(\sum_{n=n'_\delta+1}^N I(I_n \neq \hat{i}_n) - \sum_{t=1}^{\tau_N} (\sigma_{t+1} - \sigma_t)(\ell - 1)\pi_t\right) \geq \frac{\epsilon}{A}, \right. \\
&\quad \quad \left. \max_t(\sigma_{t+1} - \sigma_t) < M_\delta, \tau_N < E(\tau_N) + \frac{\epsilon}{A}\right) \\
&\leq \delta + \exp\left(-\frac{2\epsilon^2}{A^2N}\right) \\
&\quad + E\left[P_{\mathcal{A}_N, X^N}\left(\left(\sum_{n=n'_\delta+1}^N I(I_n \neq \hat{i}_n) - \sum_{t=1}^{\tau_N} (\sigma_{t+1} - \sigma_t)(\ell - 1)\pi_t\right) \geq \frac{\epsilon}{A}, \right. \right. \\
&\quad \quad \left. \left. \max_t(\sigma_{t+1} - \sigma_t) < M_\delta, \tau_N < E(\tau_N) + \frac{\epsilon}{A}\right)\right], \tag{S3.15}
\end{aligned}$$

115 where the first term follows from (S3.11) and the definition of  $M_\delta$  (S3.12), the second term from  
116 (S3.13) and last inequality follows from law of iterated expectation.

117 Then using (S3.9) we have that,

$$\begin{aligned}
& P_{\mathcal{A}_N, X^N}\left(A\left(\sum_{n=n'_\delta+1}^N I(I_n \neq \hat{i}_n) - \sum_{t=1}^{\tau_N} (\sigma_{t+1} - \sigma_t)(\ell - 1)\pi_t\right) \geq \epsilon, \right. \\
&\quad \quad \left. \max_t(\sigma_{t+1} - \sigma_t) < M_\delta, \tau_N < E(\tau_N) + \frac{\epsilon}{A}\right) \\
&\leq \begin{cases} \exp\left(-\frac{\epsilon^2}{2A^2M_\delta(E(\tau_N) + \epsilon)/4 + \epsilon/3}\right), & \text{if } \max_t(\sigma_{t+1} - \sigma_t) < M_\delta, \\ & \tau_N < E(\tau_N) + \epsilon/A; \\ 0, & \text{otherwise.} \end{cases}
\end{aligned}$$

118 Using this in (S3.15), we get,

$$\begin{aligned}
& \mathbb{E}P_{\mathcal{A}_N, \mathcal{X}^N} \left( A \left( \sum_{n=n'_\delta+1}^N I(I_n \neq \hat{i}_n) - \sum_{t=1}^{\tau_N} (\sigma_{t+1} - \sigma_t)(\ell - 1)\pi_t \right) \geq \epsilon, \right. \\
& \quad \left. \max_t (\sigma_{t+1} - \sigma_t) \leq M_\delta, \tau_N < E(\tau_N) + \epsilon/A \right) \\
& \leq \exp \left( -\frac{\epsilon^2}{2A^2 M_\delta (E(\tau_N) + \epsilon)/4 + \epsilon/3} \right). \tag{S3.16}
\end{aligned}$$

119 Therefore, combining (S3.15) and (S3.16), we get that with probability at least  $1-\delta$ ,

$$\begin{aligned}
& P \left( A \left( \sum_{n=n'_\delta+1}^N I(I_n \neq \hat{i}_n) - \sum_{t=1}^{\tau_N} (\sigma_{t+1} - \sigma_t)(\ell - 1)\pi_t \right) \geq \epsilon \right) \\
& \leq \delta + \exp \left( -\frac{2\epsilon^2}{A^2 N} \right) + \exp \left( -\frac{\epsilon^2}{2A^2 M_\delta (E(\tau_N) + \epsilon)/4 + \epsilon/3} \right).
\end{aligned}$$

In order to bound the right hand side by  $2\delta$ , let,

$$\epsilon_{N,\delta} = \max \left\{ A \sqrt{M_\delta \frac{E(\tau_N)}{2} \log \left( \frac{2}{\delta} \right)}, A \sqrt{\frac{N}{2} \log \left( \frac{2}{\delta} \right)} \right\}.$$

120 For this chosen  $\epsilon$ , we have that,

$$\begin{aligned}
& P \left( A \left( \sum_{n=n'_\delta+1}^N I(I_n \neq \hat{i}_n) - \sum_{t=1}^{\tau_N} (\sigma_{t+1} - \sigma_t)(\ell - 1)\pi_t \right) \geq \epsilon_{N,\delta} \right) \leq 2\delta \\
& \Rightarrow P \left( A \sum_{n=n'_\delta+1}^N I(I_n \neq \hat{i}_n) \geq A \sum_{t=1}^{\tau_N} (\sigma_{t+1} - \sigma_t)(\ell - 1)\pi_t + \epsilon_{N,\delta} \right) \leq 2\delta. \tag{S3.17}
\end{aligned}$$

121 Note that,

$$\begin{aligned}
& P \left( A \left( \sum_{n=n'_\delta+1}^N I(I_n \neq \hat{i}_n) - \sum_{t=1}^{\tau_N} (\sigma_{t+1} - \sigma_t)(\ell - 1)\pi_t \right) \geq \epsilon_{N,\delta} \right) \\
& \geq P \left( A \left( \sum_{n=n'_\delta+1}^N I(I_n \neq \hat{i}_n) - \sum_{t=1}^{\tau_N} (\sigma_{t+1} - \sigma_t)(\ell - 1)\pi_t \right) \geq \epsilon_{N,\delta}, \right. \\
& \quad \left. \tau_N \leq E(\tau_N) + \epsilon_1(N, \delta), \max_t (\sigma_{t+1} - \sigma_t) \leq M_\delta \right) \\
& = P \left( A \left( \sum_{n=n'_\delta+1}^N I(I_n \neq \hat{i}_n) - \sum_{t=1}^{\tau_N} (\sigma_{t+1} - \sigma_t)(\ell - 1)\pi_t \right) \geq \epsilon_{N,\delta} \mid \tau_N \leq E(\tau_N) \right. \\
& \quad \left. + \epsilon_1(N, \delta), \max_t (\sigma_{t+1} - \sigma_t) \leq M_\delta \right) \times \\
& \quad P \left( \tau_N \leq E(\tau_N) + \epsilon_1(N, \delta) \right) P \left( \max_t (\sigma_{t+1} - \sigma_t) \leq M_\delta \right) \\
& \geq P \left( A \left( \sum_{n=n'_\delta+1}^N I(I_n \neq \hat{i}_n) - \sum_{t=1}^{E(\tau_N) + \epsilon_1(N, \delta)} M_\delta (\ell - 1)\pi_t \right) \geq \epsilon_{N,\delta} \right) (1 - \delta)^2, \tag{S3.18}
\end{aligned}$$

122 where the last inequality follows from (S3.12) and (S3.14). Now, from (S3.17) and (S3.18), we get,

$$\begin{aligned}
& P \left( A \left( \sum_{n=n'_\delta+1}^N I(I_n \neq \hat{i}_n) - \sum_{t=1}^{E(\tau_N)+\epsilon_1(N,\delta)} M_\delta(\ell-1)\pi_t \right) \geq \epsilon_{N,\delta} \right) (1-\delta)^2 \\
& \leq P \left( A \left( \sum_{n=n'_\delta+1}^N I(I_n \neq \hat{i}_n) - \sum_{t=1}^{\tau_N} (\sigma_{t+1} - \sigma_t)(\ell-1)\pi_t \right) \geq \epsilon_{N,\delta} \right) \quad (\text{S3.19}) \\
& \leq 2\delta
\end{aligned}$$

123

$$\Rightarrow P \left( A \left( \sum_{n=n'_\delta+1}^N I(I_n \neq \hat{i}_n) - \sum_{t=1}^{E(\tau_N)+\epsilon_1(N,\delta)} M_\delta(\ell-1)\pi_t \right) \geq \epsilon_{N,\delta} \right) \leq \frac{2\delta}{(1-\delta)^2} \quad (\text{S3.20})$$

124 From (S3.8) and (S3.20), we get that with probability at least  $1 - 2\delta/(1-\delta)^2$ , the cumulative regret  
125 for strategy  $\eta_2$  satisfies,

$$\begin{aligned}
R_N(\eta_2) & < An'_\delta + \sum_{n=n'_\delta+1}^N 2 \left( \max_{1 \leq i \leq \ell} w(Lh_{q(n)}; f_i) + \sqrt{\frac{64c_4^2 v^2 \log(12\ell N^2/\delta)}{c_5^2 \mathfrak{C}(2L)^d h_{q(n)}^d \pi_{q(n)} q(n)}} \right) \\
& + A \sum_{t=1}^{N^*(\delta)} M_\delta(\ell-1)\pi_t + \max \left\{ A \sqrt{M_\delta \frac{E(\tau_N)}{2} \log\left(\frac{2}{\delta}\right)}, A \sqrt{\left(\frac{N}{2}\right) \log\left(\frac{2}{\delta}\right)} \right\},
\end{aligned}$$

126 for  $N^*(\delta) = E(\tau_N) + \epsilon_1(N, \delta)$ . Let  $\delta < 1/4$  and we get the desired result.  $\square$

## 127 S4 Proof of Theorem 2

128 *Proof of Theorem 2.* Similar to Theorem 1, we will first find an upper bound for the estimation error.  
129 In order to do so, in (6) of Lemma 3, we first remove condition on  $X^n$  and then remove the condition  
130 on  $\mathcal{A}_N$  from the conditional probability statement of the Lemma. Given arm  $i$ , and  $n$  large enough  
131 such that,  $n \geq m_0 + 1$  and  $\epsilon > w(Lh_{\tau_n}; f_i)$  a.s. (such  $n$  exists from Lemma 1), consider,

$$\begin{aligned}
& P_{\mathcal{A}_N} \left( |\hat{f}_{i,n+1} - f_i(X_{n+1})| \geq \epsilon \right) \\
& \leq P_{\mathcal{A}_N} \left( |\hat{f}_{i,n+1} - f_i(X_{n+1})| \geq \epsilon, M_{n+1}(X_{n+1}) \leq \frac{\mathfrak{C}(2Lh_{\tau_n})^d \tau_n}{2} \right) \\
& \quad + P_{\mathcal{A}_N} \left( |\hat{f}_{i,n+1} - f_i(X_{n+1})| \geq \epsilon, M_{n+1}(X_{n+1}) > \frac{\mathfrak{C}(2Lh_{\tau_n})^d \tau_n}{2} \right) \\
& \leq P_{\mathcal{A}_N} \left( M_{n+1}(X_{n+1}) \leq \frac{\mathfrak{C}(2Lh_{\tau_n})^d \tau_n}{2} \right) \\
& \quad + P_{\mathcal{A}_N} \left( |\hat{f}_{i,n+1} - f_i(X_{n+1})| \geq \epsilon, M_{n+1}(X_{n+1}) > \frac{\mathfrak{C}(2Lh_{\tau_n})^d \tau_n}{2} \right) \\
& \leq \exp \left( -\frac{3\mathfrak{C}(2Lh_{\tau_n})^d \tau_n}{28} \right) + \exp \left( -\frac{3\mathfrak{C}(2Lh_{\tau_n})^d \tau_n \pi_n}{56} \right) \\
& \quad + 4N \exp \left( -\frac{c_5^2 \mathfrak{C}(2Lh_{\tau_n})^d \tau_n \pi_n (\epsilon - w(Lh_{\tau_n}; f_i))^2}{8c_4^2 v^2 + 8c_4 c (\epsilon - w(Lh_{\tau_n}; f_i))} \right), \quad (\text{S4.1})
\end{aligned}$$

132 where, the above inequality follows from Lemma 3 and (S6.2).

133 Now, we want to remove the condition on  $\mathcal{A}_N$  from the above conditional probability inequality.

134 Recall that  $d_j \stackrel{\text{ind}}{\sim} G_j$ , for  $j \geq 1$ . Therefore, for the known visiting times  $\{s_j, j \geq 1\}$ ,  $P(t_j \leq n) =$

135  $P(d_j + s_j \leq n) = P(d_j \leq n - s_j) = G_j(n - s_j)$ , and hence,

$$\begin{aligned}
& P\left(|\hat{f}_{i,n+1}(X_{n+1}) - f_i(X_{n+1})| \geq \epsilon\right) \\
&= P\left(|\hat{f}_{i,n+1}(X_{n+1}) - f_i(X_{n+1})| \geq \epsilon, \tau_n \leq \frac{\sum_{j=1}^n G_j(n - s_j)}{2}\right) \\
&\quad + P\left(|\hat{f}_{i,n+1}(X_{n+1}) - f_i(X_{n+1})| \geq \epsilon, \tau_n > \frac{\sum_{j=1}^n G_j(n - s_j)}{2}\right) \\
&\leq P\left(\tau_n \leq \frac{\sum_{j=1}^n G_j(n - s_j)}{2}\right) + P\left(|\hat{f}_{i,n+1}(X_{n+1}) - f_i(X_{n+1})| \geq \epsilon, \right. \\
&\quad \left. \tau_n > \frac{\sum_{j=1}^n G_j(n - s_j)}{2}\right) \\
&\leq P\left(\tau_n \leq \frac{\sum_{j=1}^n G_j(n - s_j)}{2}\right) + EP_{\mathcal{A}_N}\left(|\hat{f}_{i,n+1}(X_{n+1}) - f_i(X_{n+1})| \geq \epsilon, \right. \\
&\quad \left. \tau_n > \frac{a_1 q(n)}{2}\right),
\end{aligned}$$

136 where  $\sum_{j=1}^n G_j(n - s_j) = \Omega(q(n))$  from Assumption 7, that is, for large enough  $n$ , we would have  
137 that  $\sum_{j=1}^n G_j(n - s_j) \geq a_1 q(n)$  for some positive constant  $a_1$ . Let  $q_1(n) = a_1 q(n)/2$ , we get, for  
138  $\tau_n > q_1(n)$ , since we have the condition that  $h_{q(n)}^d \pi_n q(n) / \log n \rightarrow \infty$ , for large enough  $n$ , we  
139 can assume that  $h_{\tau_n}^d \tau_n \geq \tilde{a}_1 h_{q_1(n)}^d q_1(n)$  and  $h_{\tau_n}^d \pi_n \tau_n \geq \tilde{a}_1 h_{q_1(n)}^d \pi_n q_1(n)$ , where  $\tilde{a}_1$  is a positive  
140 constant depending on  $a_1$  and the choice of hyperparameter sequences  $\{h_n\}$  and  $\{\pi_n\}$ . For large  
141 enough  $n$ , we have that  $\epsilon - w(Lh_{q(n)}; f_i) > 0$ . Now, using (S4.1) and (S6.2), we get,

$$\begin{aligned}
&\leq \exp\left(-\frac{3q_1(n)}{14}\right) + \exp\left(-\frac{3\mathfrak{c}(2Lh_{q_1(n)})^d q_1(n)}{28}\right) \\
&\quad + \exp\left(-\frac{3\mathfrak{c}(2Lh_{q_1(n)})^d q_1(n)\pi_n}{56}\right) \\
&\quad + 4N \exp\left(-\frac{c_5^2 \mathfrak{c}(2Lh_{q_1(n)})^d q_1(n)\pi_n (\epsilon - w(Lh_{q_1(n)}; f_i))^2}{8c_4^2 v^2 + 8c_4 c (\epsilon - w(Lh_{q_1(n)}; f_i))}\right) \\
&\leq \exp\left(-\frac{3a_1 q(n)}{28}\right) + \exp\left(-\frac{3\mathfrak{c}\tilde{a}_1 (2Lh_{q(n)})^d q(n)}{56}\right) \\
&\quad + \exp\left(-\frac{3\mathfrak{c}\tilde{a}_1 (2Lh_{q(n)})^d q(n)\pi_n}{112}\right) \\
&\quad + 4N \exp\left(-\frac{c_5^2 \mathfrak{c}\tilde{a}_1 (2Lh_{q(n)})^d q(n)\pi_n (\epsilon - w(Lh_{q(n)}; f_i))^2}{16c_4^2 v^2 + 16c_4 c (\epsilon - w(Lh_{q(n)}; f_i))}\right). \tag{S4.2}
\end{aligned}$$

142 Given  $0 < \delta < 1$ , we want to bound the R.H.S. above by  $\delta$ . To do that for the first three terms, given  
143 total time horizon  $N$ , we define a special time point  $n''_\delta$  as in (9),

$$n''_\delta = \min \left\{ n > m_0 : \exp\left(-\frac{3\mathfrak{c}\tilde{a}_1 (2Lh_{q(n)})^d \pi_n q(n)}{112}\right) \leq \frac{\delta}{4\ell N} \right\}. \tag{S4.3}$$

144 For the fourth term in the R.H.S. of (S4.2), we want to choose an  $\epsilon$  such that,

$$4N \exp\left(-\frac{c_5^2 \mathfrak{c}\tilde{a}_1 (2Lh_{q(n)})^d \pi_n q(n) (\epsilon - w(Lh_{q(n)}; f_i))^2}{16c_4^2 v^2 + 16c_4 c (\epsilon - w(Lh_{q(n)}; f_i))}\right) \leq \frac{\delta}{4\ell N}.$$

145 One such value for  $\epsilon$  is given in Lemma S2 as,

$$\tilde{\epsilon}'_{i,n} = w(Lh_{q(n)}; f_i) + \sqrt{\frac{64c_4^2 v^2 \log(16\ell N^2/\delta)}{c_5^2 \tilde{c}_{\tilde{a}_1} (2L)^d h_{q(n)}^d \pi_n q(n)}}. \quad (\text{S4.4})$$

146 By (S4.2), (S4.3) and (S4.4), for  $n \geq n''_\delta$ , we have that,

$$P\left(|\hat{f}_{i,n+1}(X_{n+1}) - f_i(X_{n+1})| \geq \tilde{\epsilon}'_{i,n}\right) \leq \frac{\delta}{4\ell N} + \frac{\delta}{4\ell N} + \frac{\delta}{4\ell N} + \frac{\delta}{4\ell N} = \frac{\delta}{\ell N},$$

147 which implies that,

$$P\left(\sum_{n=n''_\delta+1}^N 2 \sup_{1 \leq i \leq \ell} |\hat{f}_{i,n}(X_n) - f_i(X_n)| \geq \sum_{n=n''_\delta+1}^N 2 \max_{1 \leq i \leq \ell} \tilde{\epsilon}'_{i,n-1}\right) \leq \delta. \quad (\text{S4.5})$$

148 Now we want to get a bound for the randomization error regret. Given  $\epsilon > 0$ , since  $P(I_n \neq \hat{i}_n) =$   
149  $(\ell - 1)\pi_n$ , we have by the Hoeffding's inequality that,

$$P\left(A\left(\sum_{n=n''_\delta+1}^N I(I_n \neq \hat{i}_n) - \sum_{n=n''_\delta+1}^N (\ell - 1)\pi_n\right) \geq \epsilon\right) \leq \exp\left(-\frac{2\epsilon^2}{NA^2}\right).$$

150 Take  $\epsilon = A\sqrt{N/2} \log(1/\delta)$ , we get,

$$P\left(A\sum_{n=n''_\delta+1}^N I(I_n \neq \hat{i}_n) \geq A\sum_{n=n''_\delta+1}^N (\ell - 1)\pi_n + A\sqrt{\frac{N}{2}} \log\left(\frac{1}{\delta}\right)\right) \leq \delta. \quad (\text{S4.6})$$

151 Therefore, from (S4.5) and (S4.6), we get that with probability at least  $1 - 2\delta$ , the cumulative regret  
152 satisfies,

$$\begin{aligned} R_N(\eta_1) &< An''_\delta + \sum_{n=n''_\delta+1}^N 2 \left( \max_{1 \leq i \leq \ell} w(Lh_{q(n)}; f_i) + \frac{C_{N,\delta}}{\sqrt{h_{q(n)}^d \pi_n q(n)}} + A(\ell - 1)\pi_n \right) \\ &\quad + A\sqrt{\left(\frac{N}{2} \log\left(\frac{1}{\delta}\right)\right)}, \end{aligned}$$

153 where  $C_{N,\delta} = \sqrt{64c_4^2 v^2 \log(12\ell N^2/\delta)/c_5^2 \tilde{c}_{\tilde{a}_1} (2L)^d}$ . Hence the desired result.  $\square$

154 *Proof of Theorem S1.* Since a lot of steps remain the same as Theorems 1 and 2, we outline the steps  
155 that change here. Firstly, in lemma S2.1, recall,

$$\begin{aligned} &P_{X^n, \mathcal{A}_N}\left(|\hat{f}_{i,n+1}(x) - f_i(x)| \geq \epsilon\right) \\ &\stackrel{a}{\leq} \exp\left(-\frac{3M_{n+1}(x)\pi_{\tau_n}}{28}\right) + P_{X^n, \mathcal{A}_N}\left(|\hat{f}_{i,n+1}(x) - f_i(x)| \geq \epsilon, \frac{M_{i,n+1}(x)}{M_{n+1}(x)} > \frac{\pi_{\tau_n}}{2}, B_{i,n}\right) \\ &\quad + P_{X^n, \mathcal{A}_N}\left(|\hat{f}_{i,n+1}(x) - f_i(x)| \geq \epsilon, \frac{M_{i,n+1}(x)}{M_{n+1}(x)} > \frac{\pi_{\tau_n}}{2}, B_{i,n}^c\right) \\ &=: \exp\left(-\frac{3M_{n+1}(x)\pi_{\tau_n}}{28}\right) + A_1 + A_2. \end{aligned}$$

156 For  $A_1$ , by applying using lemma S9, (S2.3) will become,

$$A_1 \leq \begin{cases} 2N \exp\left(-\frac{c_5^2 M_{n+1}(x)\pi_{\tau_n}(\epsilon - w(Lh_{\tau_n}; f_i))^2}{4C^2 \nu^2}\right) & \text{if } 0 < \epsilon - w(Lh_{\tau_n}; f_i) < \nu^2 C/\alpha \\ 2N \exp\left(-\frac{c_5 M_{n+1}(x)\pi_{\tau_n}(\epsilon - w(Lh_{\tau_n}; f_i))}{4C\alpha}\right) & \text{if } \epsilon - w(Lh_{\tau_n}; f_i) > \nu^2 C/\alpha. \end{cases}$$

157 Similarly,

$$A_2 \leq \begin{cases} 2N \exp\left(-\frac{M_{n+1}(x)\pi_{\tau_n}(\epsilon - w(Lh_{\tau_n}; f_i))^2}{4C^2\nu^2}\right) & \text{if } 0 < \epsilon - w(Lh_{\tau_n}; f_i) < \nu^2C/\alpha \\ 2N \exp\left(-\frac{M_{n+1}(x)\pi_{\tau_n}(\epsilon - w(Lh_{\tau_n}; f_i))}{4C\alpha}\right) & \text{if } \epsilon - w(Lh_{\tau_n}; f_i) > \nu^2C/\alpha. \end{cases}$$

158 Therefore, Lemma 2 gets modified to the following,

$$P_{X^n, \mathcal{A}_N} \left( |\hat{f}_{i, n+1}(x) - f_i(x)| \geq \epsilon \right) \tag{S4.7}$$

$$\leq \begin{cases} \exp\left(-\frac{3M_{n+1}(x)\pi_{\tau_n}}{28}\right) + 4N \exp\left(-\frac{c_5^2 M_{n+1}(x)\pi_{\tau_n}(\epsilon - w(Lh_{\tau_n}; f_i))^2}{4C^2\nu^2}\right), & \text{if } 0 < \epsilon - w(Lh_{\tau_n}; f_i) < \nu^2C/\alpha \\ \exp\left(-\frac{3M_{n+1}(x)\pi_{\tau_n}}{28}\right) + 4N \exp\left(-\frac{c_5 M_{n+1}(x)\pi_{\tau_n}(\epsilon - w(Lh_{\tau_n}; f_i))}{4C\alpha}\right), & \text{if } \epsilon - w(Lh_{\tau_n}; f_i) > \nu^2C/\alpha. \end{cases}$$

159 Following through with the same logic, we get that (S3.5) in proof of 1 would become, for large  
160 enough  $n$ ,

$$P(|\hat{f}_{i, n+1}(X_{n+1}) - f_i(X_{n+1})| \geq \epsilon)$$

$$\leq \begin{cases} \exp\left(-\frac{3a_1q(n)}{28}\right) + \exp\left(-\frac{3\underline{c}\tilde{a}_1(2Lh_{q(n)})^dq(n)}{56}\right) + \exp\left(-\frac{3\underline{c}\tilde{a}_1(2Lh_{q(n)})^dq(n)\pi_{q(n)}}{112}\right) \\ + 4N \exp\left(-\frac{c_5^2\underline{c}\tilde{a}_1(2Lh_{q(n)})^dq(n)\pi_{q(n)}(\epsilon - w(Lh_{q(n)}; f_i))^2}{8C^2\nu^2}\right), & \text{if } \epsilon - w(Lh_{q(n)}; f_i) < \nu^2C/\alpha \\ \exp\left(-\frac{3a_1q(n)}{28}\right) + \exp\left(-\frac{3\underline{c}\tilde{a}_1(2Lh_{q(n)})^dq(n)}{56}\right) + \exp\left(-\frac{3\underline{c}\tilde{a}_1(2Lh_{q(n)})^dq(n)\pi_{q(n)}}{112}\right) \\ + 4N \exp\left(-\frac{c_5^2\underline{c}\tilde{a}_1(2Lh_{q(n)})^dq(n)\pi_{q(n)}(\epsilon - w(Lh_{q(n)}; f_i))}{8C\alpha}\right), & \text{if } \epsilon - w(Lh_{q(n)}; f_i) > \nu^2C/\alpha \end{cases}$$

161 Then, bounding the above terms by  $\delta > 0$ , we would get a version of Lemma S1,

$$Z := \tilde{\epsilon}_{i, n} - w(Lh_{q(n)}; f_i)$$

$$= \begin{cases} \sqrt{\frac{8C^2\nu^2 \log(16\ell N^2/\delta)}{c_5^2\underline{c}\tilde{a}_1(2L)^dh_{q(n)}^d\pi_{q(n)}q(n)}} & \text{if } Z < \nu^2C/\alpha \\ \frac{8C\alpha \log(16\ell N^2/\delta)}{c_5^2\underline{c}\tilde{a}_1(2L)^dh_{q(n)}^d\pi_{q(n)}q(n)} & \text{if } Z > \nu^2C/\alpha \end{cases}$$

162 The above conditions then imply, case one  $Z < \nu^2C/\alpha$  is the same as,

$$h_{q(n)}^dq(n)\pi_{q(n)} > \frac{8 \log(16\ell N^2/\delta)\alpha^2}{\nu^2c_5\underline{c}\tilde{a}_1(2L)^d},$$

163 while case 2, that is,  $Z > \nu^2C/\alpha$  is the compliment of this,

$$h_{q(n)}^dq(n)\pi_{q(n)} < \frac{8 \log(16\ell N^2/\delta)\alpha^2}{\nu^2c_5\underline{c}\tilde{a}_1(2L)^d}.$$

164 Note that the modification of sub-exponential errors does not effect the randomization error, we get  
165 the final result for 1 as follows, Then for  $0 < \delta \leq 1/4$ , we have that, with probability at least  $1 - \frac{32\delta}{9}$ ,

166 the cumulative regret for  $\eta_2$  satisfies,

$$R_N(\eta_2) < \begin{cases} An'_\delta + \sum_{n=n'_\delta+1}^N 2 \left( \max_{1 \leq i \leq \ell} w(Lh_{q(n)}; f_i) + \frac{C'_{N,\delta}}{\sqrt{h_{q(n)}^d \pi_{q(n)} q(n)}} \right) \\ \quad + A \sum_{t=1}^{N^*(\delta)} M_\delta(\ell-1)\pi_t + \max \left\{ A\sqrt{M_\delta \frac{E(\tau_N)}{2} \log\left(\frac{2}{\delta}\right)}, A\sqrt{\left(\frac{N}{2}\right) \log\left(\frac{2}{\delta}\right)} \right\}, \\ \quad \text{if } h_{q(n)}^d q(n) \pi_{q(n)} > \frac{8 \log(16\ell N^2/\delta) \alpha^2}{\nu^2 c_5 \underline{c} \tilde{a}_1 (2L)^d}, \\ An'_\delta + \sum_{n=n'_\delta+1}^N 2 \left( \max_{1 \leq i \leq \ell} w(Lh_{q(n)}; f_i) + \frac{C'_{N,\delta}}{h_{q(n)}^d \pi_{q(n)} q(n)} \right) \\ \quad + A \sum_{t=1}^{N^*(\delta)} M_\delta(\ell-1)\pi_t + \max \left\{ A\sqrt{M_\delta \frac{E(\tau_N)}{2} \log\left(\frac{2}{\delta}\right)}, A\sqrt{\left(\frac{N}{2}\right) \log\left(\frac{2}{\delta}\right)} \right\}, \\ \quad \text{if } h_{q(n)}^d q(n) \pi_{q(n)} < \frac{8 \log(16\ell N^2/\delta) \alpha^2}{\nu^2 c_5 \underline{c} \tilde{a}_1 (2L)^d}, \end{cases}$$

167 where,  $C'_{N,\delta} = \sqrt{8C^2 \nu^2 \log(16\ell N^2/\delta) / c_5 \underline{c} \tilde{a}_1 (2L)^d}$  and  $C''_{N,\delta} =$   
 168  $8\alpha C \log(16\ell N^2/\delta) / (c_5 \underline{c} \tilde{a}_1 (2L)^d)$ . □

## 169 S5 More simulation results

170 Here, we display plots for the three simulation settings for different combinations of hyperparameter  
 171 sequences,  $\{\pi_n = (\log n)^{-2}, h_n = n^{-1/4}\}$  in figure 1 and  $\{\pi_n = (\log n)^{-2}, h_n = (\log n)^{-1}\}$  in  
 172 figure 2, respectively. Again, we used  $\lambda_1 = 1$  for strategy  $\eta_{\text{adapt}_1}$  for all simulation setups and also,  
 173  $\lambda_2 = 1$  for both setups 2 and 3, but  $\lambda_2 = 3$  for  $\eta_{\text{adapt}_2}$  in setup 1. A thorough investigation may be  
 174 needed for the selection of  $\lambda_1$  and  $\lambda_2$  for easy applicability in practical real-world decision making  
 175 problems. In our simulation study, we get promising results from these adaptive strategies as they  
 176 perform better (or at par) than both  $\eta_1$  and  $\eta_2$ .

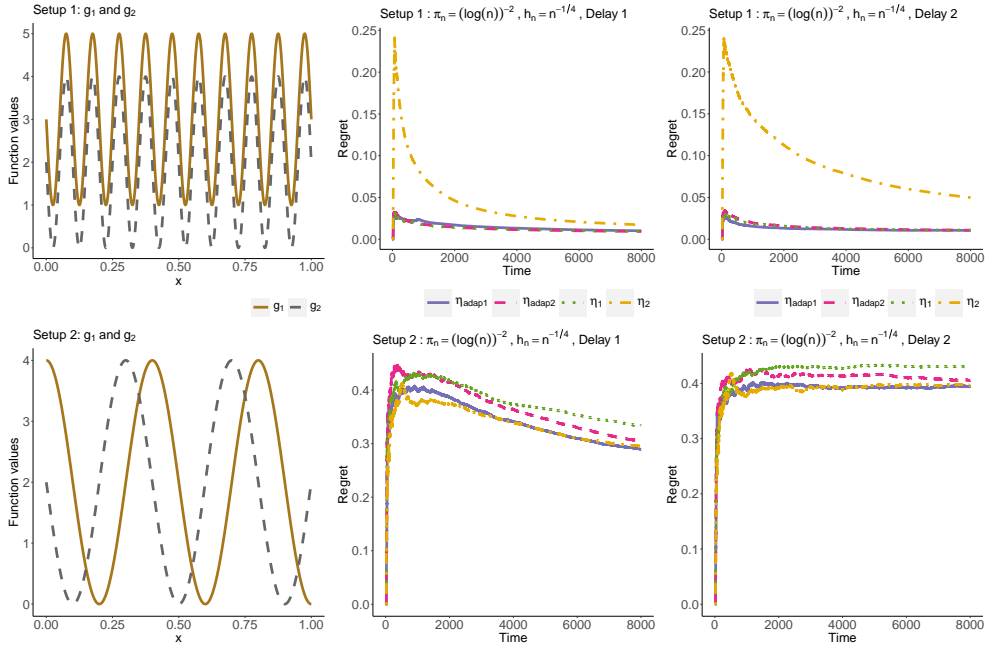

Figure 1: Strategy  $\eta_{\text{adapt}_1}$  and  $\eta_{\text{adapt}_2}$  have lower (or at par) cumulative average regret than  $\eta_1$  and  $\eta_2$  for the three simulation settings.

177 We also consider another extreme setup, where one of the functions has a big spike and the other is  
 178 constant.

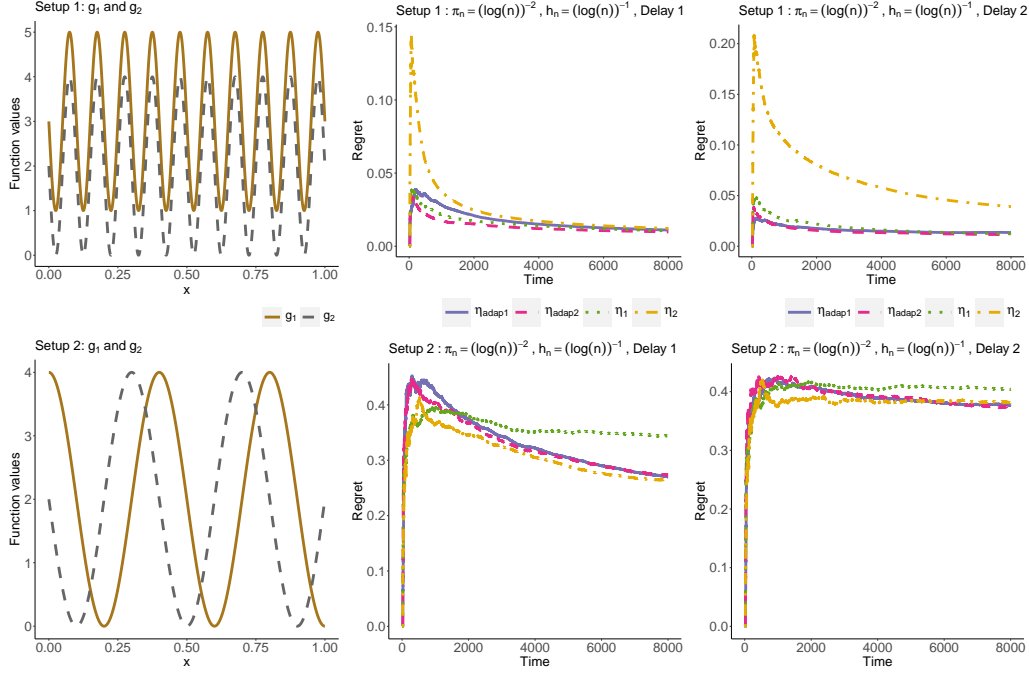

Figure 2: Strategy  $\eta_{\text{adap}_1}$  and  $\eta_{\text{adap}_2}$  have lower (or at par) cumulative average regret than  $\eta_1$  and  $\eta_2$  for the two simulation settings.

179 **Setup 3:** Consider a setup where one arm dominates over majority of the covariate space, except for  
 180 a small area where it incurs a considerably high regret.

$$g_1(x) = 1, \text{ for all } x \in [0, 1]; g_2(x) = \begin{cases} 0 & 0 \leq x < 0.5, 0.505 \leq x \leq 1 \\ 100000x - 50000 & 0.5 \leq x < 0.502 \\ 200 & 0.502 \leq x < 0.503 \\ -100000 * x + 50500 & 0.503 \leq x < 0.505. \end{cases}$$

181 We look at both the setup  $d = 2$ , when  $f_1(x_1, x_2) = g_1(x_1) * x_2$  and  $f_2(x_1, x_2) = g_2(x_1) * x_2$ .  
 182 The corresponding regret plots are in Figure 3. Note that the adaptive strategies  $\eta_{\text{adap}_1}$  and  $\eta_{\text{adap}_2}$  outperform  $\eta_1$  and  $\eta_2$  in this setting.

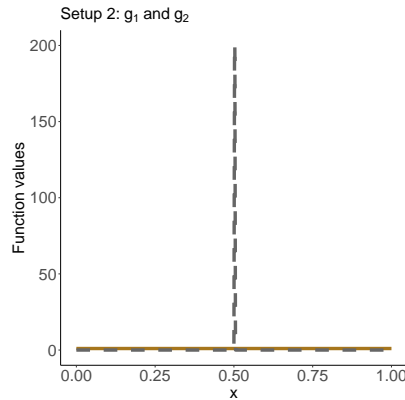

183



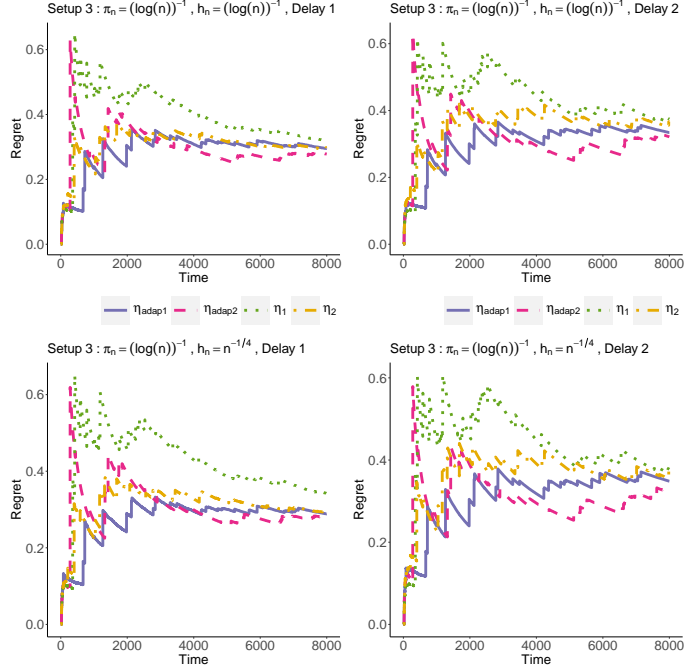

Figure 3: Strategy  $\eta_{\text{adap}_1}$  and  $\eta_{\text{adap}_2}$  have lower (or at par) cumulative average regret than  $\eta_1$  and  $\eta_2$  for Setting 3.

## 184 S6 Appendix

185 In this section, we enlist some well-known technical tools that are used in the paper. We first state the  
 186 famous Borel-Cantelli Lemma.

187 **Lemma S3 (A.1).** [Borel-Cantelli] Let  $(A_1, A_2, \dots)$  be a sequence of events in a common probability  
 188 space  $(\Omega, \mathcal{F}, P)$  and set  $A = \limsup_{n \rightarrow \infty} A_n$ . If  $\sum_{n=1}^{\infty} P(A_n) < \infty$ , then  $P(A) = 0$ .

189 This result is useful in assessing almost sure convergence and is often used in the analysis presented  
 190 in the following chapters. Next, we define the modulus of continuity, which quantifies the maximum  
 191 differences in functional values for a given function on a given domain.

192 **Definition 1.** Let  $x_1, x_2 \in [0, 1]^d$ . Then  $w(h; f)$  denotes a modulus of continuity defined by,  
 193  $w(h; f) = \sup\{|f(x_1) - f(x_2)| : |x_{1k} - x_{2k}| \leq h \text{ for all } 1 \leq k \leq d\}$ .

194 It can be seen that if  $f$  is continuous then  $w(h; f) \rightarrow 0$  as  $h \rightarrow 0$ .

195 Next, we review some concentration inequalities, which are quite standard results and will be used in  
 196 the following chapters.

### 197 S6.1 Concentration inequalities

198 **Lemma S4 (Hoeffding's Inequality).** Let  $X_1, X_2, \dots, X_n$  be independent real-valued random  
 199 variables such that for each  $i = 1, \dots, n$  there exists some  $a_i \leq b_i$  such that  $P[a_i \leq X_i \leq b_i] = 1$ .  
 200 Then for every  $\epsilon > 0$ ,

$$P \left[ \sum_{i=1}^n X_i - E \sum_{i=1}^n X_i > \epsilon \right] \leq \exp \left( - \frac{2\epsilon^2}{\sum_{i=1}^n (b_i - a_i)^2} \right)$$

201 More such inequalities with their proofs can be found in Hoeffding (1994).

202 The martingale version of Hoeffding inequality has also been derived and is known as the Azuma-  
 203 Hoeffding inequality.

204 **Lemma S5** (Azuma-Hoeffding Inequality). Suppose  $\mathcal{F}_j, j = 1, 2, \dots$  is an increasing filtration of  $\sigma$ -  
 205 fields. For each  $j \geq 1$ , let  $X_j$  be  $\mathcal{F}_j$ -measurable such that  $X_j \geq 0$  almost surely, and  $a_j \leq X_j \leq b_j$ ,  
 206 then for all  $\epsilon > 0$ , we have,

$$P \left[ \sum_{j=1}^n X_j - \sum_{j=1}^n E(X_j | \mathcal{F}_{j-1}) > \epsilon \right] \leq \exp \left( -\frac{2\epsilon^2}{\sum_{j=1}^n (b_j - a_j)^2} \right)$$

207 One if referred to McDiarmid (1998) for more details and a proof of the inequality.

208 **Lemma S6.** A.4[Bernstein's Inequality] Let  $X_1, \dots, X_n$  be independent real-valued random vari-  
 209 ables with zero mean, and assume that  $X_1 \leq 1$  with probability 1. Let  $V_j = \text{Var}(X_j)$  and  
 210  $\sigma^2 = \sum_{j=1}^n V_j$ . For any  $\epsilon > 0$ ,

$$P \left[ \frac{1}{n} \sum_{i=1}^n X_i > \epsilon \right] \leq \exp \left( -\frac{n\epsilon^2}{2\sigma^2 + 2\epsilon/3} \right) \quad (\text{S6.1})$$

211 Proofs of these inequalities can be found in Cesa-Bianchi and Lugosi (2006).

212 **Corollary S1.** Suppose  $\tilde{W}_1, \tilde{W}_2, \dots, \tilde{W}_n$ , are independent Bernoulli random variables with success  
 213 probability  $\beta_j$ . By Bernstein's inequality in (S6.1),

$$P \left( \sum_{j=1}^n \tilde{W}_j \leq \left( \sum_{j=1}^n \beta_j \right) / 2 \right) \leq \exp \left( -\frac{3 \sum_{j=1}^n \beta_j}{28} \right).$$

214 The proof follows by substituting  $\epsilon = \left( \sum_{j=1}^n \beta_j \right) / 2$  and  $X_j = \beta_j - \tilde{W}_j$  in (S6.1). Note that the same  
 215 inequality holds for any Bernoulli random variable where  $W_j$  takes values  $a_j \leq 1, \forall j \geq 1$  and 0.

216 The Bernstein's inequality has been extended to the case of martingales.

217 **Lemma S7** (Bernstein's Inequality for Martingales). Let  $(\Omega, \mathcal{F}, P)$  be a probability space. Let  
 218  $\mathcal{F}_j, j = 1, 2, \dots$ , be an increasing filtration of sub- $\sigma$ -fields of  $\mathcal{F}$ . Let  $X_1, X_2, \dots$  be random  
 219 variables on  $(\Omega, \mathcal{F}, P)$ , such that  $X_j$  is  $\mathcal{F}_j$ -measurable. Assume  $|X_j| \leq K$  with probability 1, for  
 220 all  $j \geq 1$ . Let  $V_j = \text{Var}(X_j | \mathcal{F}_{j-1})$  and denote the sum of conditional variances by, Then for all  
 221 positive real numbers  $\epsilon$  and  $v$ ,

$$P \left( \sum_{j=1}^n (X_j - E(X_j | \mathcal{F}_{j-1})) > \epsilon, \sum_{j=1}^n V_j \leq v \right) \leq \exp \left( -\frac{\epsilon^2}{2(v + K\epsilon/3)} \right)$$

222 The proof of this inequality can be found in Freedman (1975).

223 **Corollary S2** (Extended Bernstein Inequality). Suppose  $\{\mathcal{F}_j, j = 1, 2, \dots\}$  is an increasing filtration  
 224 of  $\sigma$ -fields. For each  $j \geq 1$ , let  $W_j$  be an  $\mathcal{F}_j$ -measurable Bernoulli random variable whose conditional  
 225 success probability satisfies

$$P(W_j = 1 | \mathcal{F}_{j-1}) \geq \beta_j$$

226 for some  $\beta_j \in [0, 1]$ . Then given  $n \geq 1$ ,

$$P \left( \sum_{j=1}^n W_j \leq \left( \sum_{j=1}^n \beta_j \right) / 2 \right) \leq \exp \left( -\frac{3 \sum_{j=1}^n \beta_j}{28} \right) \quad (\text{S6.2})$$

227 The proof for this can be found in Qian and Yang (2016).

228 **Lemma S8.** Suppose  $\{\mathcal{F}_j, j = 1, 2, \dots\}$  is an increasing filtration of  $\sigma$ -fields. For each  $j \geq 1$ ,  
 229 let  $\epsilon_j$  be an  $\mathcal{F}_{j+1}$ -measurable random variable that satisfies  $E(\epsilon_j | \mathcal{F}_j) = 0$ , and let  $W_j$  be an  $\mathcal{F}_j$ -  
 230 measurable random variable that is upper bounded by a constant  $C > 0$  in absolute value almost  
 231 surely. If there exists positive constants  $v$  and  $c$  such that for all  $k \geq 2$  and  $j \geq 1$ ,  $E(|\epsilon_j|^k | \mathcal{F}_j) \leq$   
 232  $k!v^2 c^{k-2}/2$ , then for every  $\epsilon > 0$  and every integer  $n \geq 1$ ,

$$P \left( \sum_{j=1}^n W_j \epsilon_j \geq n\epsilon \right) \leq \exp \left( -\frac{n\epsilon^2}{2C^2(v^2 + c\epsilon/C)} \right). \quad (\text{S6.3})$$

233 *Proof of Lemma S8.* Lemma S8 is the same as Lemma 1 in Qian and Yang (2016) and the proof for  
 234 the same can be found there.  $\square$

235 A simplified version of Lemma S8 can be stated as follows.

236 **Corollary S3.** Let  $\epsilon_1, \epsilon_2, \dots$  be independent random variables satisfying the refined Bernstein  
 237 condition, that is, if there exists positive constants  $v$  and  $c$  such that for all  $k \geq 2$  and  $j \geq 1$ ,  
 238  $E|\epsilon_j|^k \leq k!v^2c^{k-2}/2$ . Let  $I_1, I_2, \dots$  be Bernoulli random variables such that  $I_j$  is independent of  
 239  $\{\epsilon_l : l \geq j\}$  for all  $j \geq 1$ . For any  $\epsilon > 0$ ,

$$P\left(\sum_{j=1}^n I_j \epsilon_j \geq n\epsilon\right) \leq \exp\left(-\frac{n\epsilon^2}{v^2 + c\epsilon}\right). \quad (\text{S6.4})$$

240 The proof for this lemma can be found in Yang and Zhu (2002).

241 **Lemma S9.** Suppose  $\{\mathcal{F}_j, j = 1, 2, \dots\}$  is an increasing filtration of  $\sigma$ -fields. For each  $j \geq 1$ ,  
 242 let  $\epsilon_j$  be an  $\mathcal{F}_{j+1}$ -measurable random variable that satisfies  $E(\epsilon_j|\mathcal{F}_j) = 0$ , and let  $W_j$  be an  $\mathcal{F}_j$ -  
 243 measurable random variable that is upper bounded by a constant  $C > 0$  in absolute value almost  
 244 surely. If  $\epsilon_j \sim \text{sub-Exp}(v^2, \alpha)$ , then for every  $\epsilon > 0$  and every integer  $n \geq 1$ ,

$$P\left(\sum_{j=1}^n W_j \epsilon_j \geq n\epsilon\right) \leq \begin{cases} \exp\left(-\frac{n\epsilon^2}{2C^2(v^2 + c\epsilon/C)}\right) & , \text{ when } 0 < \epsilon < \frac{v^2C}{\alpha} \\ \exp\left(-\frac{n\epsilon}{2\alpha C}\right) & , \text{ when } \epsilon > \frac{v^2C}{\alpha}. \end{cases} \quad (\text{S6.5})$$

## 245 References

- 246 Cesa-Bianchi, N. and Lugosi, G. (2006). *Prediction, learning, and games*. Cambridge University  
 247 Press.
- 248 Freedman, D. A. (1975). On tail probabilities for martingales. *the Annals of Probability*, pages  
 249 100–118.
- 250 Hoeffding, W. (1994). Probability inequalities for sums of bounded random variables. In *The*  
 251 *Collected Works of Wassily Hoeffding*, pages 409–426. Springer.
- 252 McDiarmid, C. (1998). Concentration. In *Probabilistic methods for algorithmic discrete mathematics*,  
 253 pages 195–248. Springer.
- 254 Qian, W. and Yang, Y. (2016). Kernel estimation and model combination in a bandit problem with  
 255 covariates. *Journal of Machine Learning Research*, (1):5181–5217.
- 256 Yang, Y. and Zhu, D. (2002). Randomized allocation with nonparametric estimation for a multi-armed  
 257 bandit problem with covariates. *Annals of Statistics*, pages 100–121.
